# Supplementary material for: quantGenius: implementation of a decision support system for qPCR-based gene quantification
Source: PubMed Central journal article supplement (PMC5445471; doi:10.1186/s12859-017-1688-7), 2017-05-25
Supplement: 12859_2017_1688_MOESM2_ESM.pdf [file 12859_2017_1688_MOESM2_ESM.pdf]

**Additional file 2: Equations used in quantGenius workflow.** For all the calculation steps, the names of the parameters (in bold), their descriptions and equations are shown. All averages are calculated as arithmetic means.

| Step                                                        | Equation number, parameter name, description and equation                                                                                                                                                                                                                                                                                                                           |
|-------------------------------------------------------------|-------------------------------------------------------------------------------------------------------------------------------------------------------------------------------------------------------------------------------------------------------------------------------------------------------------------------------------------------------------------------------------|
| Replicates                                                  | <p><b>1 Average C<sub>q</sub> value:</b> average of the replicates (nr = number of replicates)</p> $\overline{Cq} = \frac{Cq_1 + Cq_2 + \dots + Cq_{nr}}{nr}$                                                                                                                                                                                                                       |
|                                                             | <p><b>2 Replicates ΔC<sub>q</sub>:</b> difference between the technical replicates (nr = number of replicates)</p> $\Delta Cq = \max(Cq_1, Cq_2, \dots, Cq_{nr}) - \min(Cq_1, Cq_2, \dots, Cq_{nr})$                                                                                                                                                                                |
| Standard curve parameters                                   | <p><b>3 log<sub>10</sub>(rel. quantity):</b> logarithm with a base of 10 of the relative (arbitrary) copy number (specified in the input according to the dilution)</p> $\log_{relQuant} = \log_{10}(\text{relQuant})$                                                                                                                                                              |
|                                                             | <p><b>4 Slope:</b> regression slope of the standard curve (x = log<sub>relQuant</sub>; y= C<sub>q</sub>; n = number of dilutions in the standard curve)</p> $slope_{std\ curve} = \frac{\sum_{i=1}^n (\log_{relQuant\ i} - \overline{\log_{relQuant}}) \cdot \sum_{i=1}^n (Cq_i - \overline{Cq})}{\sum_{i=1}^n (\log_{relQuant\ i} - \overline{\log_{relQuant}})^2}$                |
|                                                             | <p><b>5 Partial slope:</b> slope between two consecutive dilutions of the standard curve (see above)</p>                                                                                                                                                                                                                                                                            |
|                                                             | <p><b>6 Inverse slope:</b> slope of the standard curve, used for copy number calculation (x = log<sub>relQuant</sub>; y= C<sub>q</sub>; n = number of dilutions in the standard curve)</p> $inverse\ slope_{std\ curve} = \frac{\sum_{i=1}^n (Cq_i - \overline{Cq}) \cdot \sum_{i=1}^n (\log_{rel\ quant\ i} - \overline{\log_{relQuant}})}{\sum_{i=1}^n (Cq_i - \overline{Cq})^2}$ |
|                                                             | <p><b>7 Intercept:</b> intercept of the y-axis regression line</p> $intercept_{std\ curve} = \overline{\log_{relQuant}} - inverse\ slope_{std\ curve} \cdot \overline{Cq}$                                                                                                                                                                                                          |
|                                                             | <p><b>8 Correlation coefficient (rsq):</b> square of the Pearson correlation coefficient between log concentrations and C<sub>q</sub> values</p> $r^2 = \left( \frac{\sum (\log_{rel\ quant} - \overline{\log_{relQuant}}) (Cq - \overline{Cq})}{\sqrt{\sum (\log_{rel\ quant} - \overline{\log_{relQuant}})^2 \sum (Cq - \overline{Cq})^2}} \right)^2$                             |
|                                                             | <p><b>9 Slope:</b> regression slope of the two sample dilutions, (x = log<sub>relQuant</sub>; y= C<sub>q</sub>; dil1 = 1<sup>st</sup> dilution, dil2 = 2<sup>nd</sup> dilution)</p> $slope_{sample} = \frac{Cq_{dil2} - Cq_{dil1}}{\log_{relQuant\ dil2} - \log_{relQuant\ dil1}}$                                                                                                  |
|                                                             | <p><b>10 Slope difference:</b> deviation of the sample slope (Equation 9) from the standard curve slope (Equation 4)</p> $slope\ difference =  slope_{sample} - slope_{std\ curve} $                                                                                                                                                                                                |
| Relative copy number calculation (each dilution separately) | <p><b>11 Calculated copy no.:</b> relative copy number of the sample based on the standard curve</p> $copyNo_i = 10^{(Cq_i \cdot inverse\ slope_{std\ curve} + intercept_{std\ curve})}$                                                                                                                                                                                            |
|                                                             | <p><b>12 Average copy no.:</b> average copy number of technical replicates of the same dilution (nr = number of replicates)</p> $\overline{copyNo} = \frac{copyNo_1 + \dots + copyNo_{nr}}{nr}$                                                                                                                                                                                     |
|                                                             | <p><b>13 CV copy no.:</b> coefficient of variation of copy numbers calculated from technical replicates of the same dilution (SD – standard deviation)</p> $CV_{replicate\ copyNo} = \frac{SD_{copyNo_1 + \dots + copyNo_{nr}}}{\overline{copyNo}} \cdot 100$                                                                                                                       |

| Step                                    | Equation number, parameter name, description and equation                                                                                                                                                                                                                                                      |
|-----------------------------------------|----------------------------------------------------------------------------------------------------------------------------------------------------------------------------------------------------------------------------------------------------------------------------------------------------------------|
| Dilution correction                     | <p>14 <b>Dilution corrected copy no.:</b> takes the dilution (defined by the Rel. quantity in the data input) into account</p> $copyNo_{dilCorr} = \frac{\overline{copyNo}}{relQuant} \cdot 1000$                                                                                                              |
|                                         | <p>15 <b>CV dilutions:</b> Coefficients of variation of copy numbers calculated from different dilutions</p> $CV_{dil\ copyNo} = \frac{SD_{copyNo_{dilCorr}}}{\overline{copyNo_{dilCorr}}} \cdot 100$                                                                                                          |
|                                         | <p>16 <b>Quality controlled copy no.:</b> calculated only for the reference genes if the QC criteria (Figure 4, step 1) are met</p> $copyNo_{QC} = copyNo_{dilCorr}$                                                                                                                                           |
| Normalization                           | <p>17 <b>Average reference gene:</b> average copy number of all the samples in the experiment, calculated for each reference gene separately (k = number of samples in the experiment)</p> $\overline{reference\ gene}_i = \frac{\sum_{i=1}^k copyNo_{QC}}{count_{copyNo_{QC}}}$                               |
|                                         | <p>18 <b>Scaled reference copy no.:</b> for each sample and reference gene, consecutive reference genes are scaled to the average of the first imported one</p> $scaled\ copy\ No_m = \frac{copyNo_{QC_m} \cdot \overline{reference\ gene}_1}{\overline{reference\ gene}_i}$                                   |
|                                         | <p>19 <b>Reference copy no.:</b> reference copy number used for normalization (average of scaled reference gene copy numbers for each sample)</p> $reference\ copyNo = \frac{copyNo_{QC_1} + scaled\ copyNo_2 + \dots + scaled\ copyNo_m}{n_{ref\ genes}}$                                                     |
|                                         | <p>20 <b>Normalized target copy number:</b> target copy number (Equation 14) normalized to reference copy number (Equation 19)</p> $normalized\ target\ copyNo = \frac{copyNo_{dilCorr}}{reference\ copyNo}$                                                                                                   |
| Final result calculation (target genes) | <p>21 <b>Final result:</b> average of normalized target copy numbers (Equation 20) of both dilutions, calculated if all the condition are met (see Figure 4, steps 2-4)</p> $Final\ result = \frac{normalized\ target\ copyNo_{dil1} + normalized\ target\ copyNo_{dil2}}{2}$                                  |
|                                         | <p>22 <b>CV of the normalized target copy number:</b> Coefficient of variation between the normalized copy numbers (Equation 20) calculated from both dilutions (SD = standard deviation)</p> $CV_{normalized\ target\ copyNo} = \frac{SD_{normalized\ target\ copyNo}}{normalized\ target\ copyNo} \cdot 100$ |
|                                         | <p>23 <b>Copy number at LOQ:</b> Copy number at the C<sub>q</sub> value of the LOQ value, used for imputation</p> $copyNo_{LOQ} = \frac{10^{(Cq_{LOQ} \cdot inverse\ slope_{std\ curve} + intercept_{std\ curve})}}{relQuant_{1^{st}\ dilution}} \cdot 1000$                                                   |
|                                         | <p>24 <b>Imputed copy number for the reactions below LOQ</b></p> $Imputed\ copyNo_{LOQ} = \frac{copyNo_{LOQ}}{reference\ gene_i} / 2$                                                                                                                                                                          |
|                                         | <p>25 <b>Imputed copy number for the reactions below LOD (not detected)</b></p> $Imputed\ copyNo_{LOD} = \frac{copyNo_{LOQ}}{reference\ gene_i} / 10$                                                                                                                                                          |
