# Supplementary material for: quantGenius: implementation of a decision support system for qPCR-based gene quantification
Source: PubMed Central journal article supplement (PMC5445471; doi:10.1186/s12859-017-1688-7), 2017-05-25
Supplement: 12859_2017_1688_MOESM8_ESM.pdf [file 12859_2017_1688_MOESM8_ESM.pdf]

## No quality control

### Reference gene (lectin)

| Involved | Sample name | Cq value  | Average Cq value | Replicates Δ Cq | Rel. quantity | log (Rel. quantity) | Slope   | Slope difference | Calculated copy no. | CV copy no. | Average copy no. | dilution corrected copy no. | CV dilutions | Quality controlled copy no. |
|----------|-------------|-----------|------------------|-----------------|---------------|---------------------|---------|------------------|---------------------|-------------|------------------|-----------------------------|--------------|-----------------------------|
| ✓        | G007/05-1   | 32.498783 | 32.4501          | 0.1             | 3             | 0.4771              | 10.8586 | 14.24            | 0.04                | 4.66        | 0.04             | 13.42                       | 138.63       | 13.42                       |
| ✓        | G007/05-1   | 32.40136  |                  |                 | 3             | 0.4771              |         |                  | 0.04                |             |                  |                             |              |                             |
| ✓        | G007/05-1   | 27.189297 | 27.2692          | 0.16            | 1             | 0                   |         |                  | 1.42                | 7.64        | 1.34             | 1344.54                     |              | 1344.54                     |
| ✓        | G007/05-1   | 27.349133 |                  |                 | 1             | 0                   |         |                  | 1.27                |             |                  |                             |              |                             |
| ✓        | G007/05-2   | 35.091858 | 34.3439          | 1.5             | 3             | 0.4771              | 13.9803 | 17.36            | 0.01                | 66.06       | 0.01             | 4.21                        | 140.26       | 4.21                        |
| ✓        | G007/05-2   | 33.59591  |                  |                 | 3             | 0.4771              |         |                  | 0.02                |             |                  |                             |              |                             |
| ✓        | G007/05-2   | 27.750986 | 27.6736          | 0.15            | 1             | 0                   |         |                  | 0.97                | 7.4         | 1.02             | 1022.46                     |              | 1022.46                     |
| ✓        | G007/05-2   | 27.596184 |                  |                 | 1             | 0                   |         |                  | 1.08                |             |                  |                             |              |                             |

### Transgene(RRS)

| Involved | Sample name | Cq value  | Average Cq value | Replicates Δ Cq | Rel. quantity | log (Rel. quantity) | Slope  | Slope difference | Calculated copy no. | CV copy no. | Average copy no. | dilution corrected copy no. | CV dilutions | Reference copy no. | Normalized target copy no. | Final result | CV Normalized target copy no. | Warning |  |
|----------|-------------|-----------|------------------|-----------------|---------------|---------------------|--------|------------------|---------------------|-------------|------------------|-----------------------------|--------------|--------------------|----------------------------|--------------|-------------------------------|---------|--|
| ✓        | G007/05-1   | 31.173443 | 31.2018          | 0.06            | 3             | 0.4771              | 2.7508 | 6.25             | 0.33                | 2.62        | 0.32             | 107.05                      | 106.36       | 13.42              | 7.98                       | 4.269        | 122.78                        |         |  |
| ✓        | G007/05-1   | 31.230198 |                  |                 | 3             | 0.4771              |        |                  | 0.32                |             |                  |                             |              |                    |                            |              |                               |         |  |
| ✓        | G007/05-1   | 29.857807 | 29.8893          | 0.06            | 1             | 0                   |        |                  | 0.77                | 2.91        | 0.76             | 756.55                      |              | 1344.54            | 0.56                       |              |                               |         |  |
| ✓        | G007/05-1   | 29.920862 |                  |                 | 1             | 0                   |        |                  | 0.74                |             |                  |                             |              |                    |                            |              |                               |         |  |
| ✓        | G007/05-2   | 32.371902 | 32.5054          | 0.27            | 3             | 0.4771              | 4.7414 | 8.25             | 0.15                | 12.3        | 0.14             | 45.87                       | 121.37       | 4.21               | 10.9                       | 5.742        | 126.94                        |         |  |
| ✓        | G007/05-2   | 32.638992 |                  |                 | 3             | 0.4771              |        |                  | 0.13                |             |                  |                             |              |                    |                            |              |                               |         |  |
| ✓        | G007/05-2   | 30.323923 | 30.2432          | 0.16            | 1             | 0                   |        |                  | 0.57                | 7.44        | 0.6              | 601.2                       |              | 1022.46            | 0.59                       |              |                               |         |  |
| ✓        | G007/05-2   | 30.162497 |                  |                 | 1             | 0                   |        |                  | 0.63                |             |                  |                             |              |                    |                            |              |                               |         |  |

## quantGenius (dafault QC parameters)

### Reference gene (lectin)

| Involved | Sample name | Cq value  | Average Cq value | Replicates Δ Cq | Rel. quantity | log (Rel. quantity) | Slope   | Slope difference | Calculated copy no. | CV copy no. | Average copy no. | dilution corrected copy no. | CV dilutions | Quality controlled copy no. |
|----------|-------------|-----------|------------------|-----------------|---------------|---------------------|---------|------------------|---------------------|-------------|------------------|-----------------------------|--------------|-----------------------------|
| ✓        | G007/05-1   | 32.498783 | 32.4501          | 0.1             | 3             | 0.4771              | 10.8586 | 14.24            | 0.04                | 4.66        | 0.04             | 13.42                       | 138.63       | <a href="#">i Explain</a>   |
| ✓        | G007/05-1   | 32.40136  |                  |                 | 3             | 0.4771              |         |                  | 0.04                |             |                  |                             |              | <a href="#">i Explain</a>   |
| ✓        | G007/05-1   | 27.189297 | 27.2692          | 0.16            | 1             | 0                   |         |                  | 1.42                | 7.64        | 1.34             | 1344.54                     |              | <a href="#">i Explain</a>   |
| ✓        | G007/05-1   | 27.349133 |                  |                 | 1             | 0                   |         |                  | 1.27                |             |                  |                             |              |                             |
| ✓        | G007/05-2   | 35.091858 | 34.3439          | 1.5             | 3             | 0.4771              | 13.9803 | 17.36            | 0.01                | 66.06       | 0.01             | 4.21                        | 140.26       | <a href="#">i Explain</a>   |
| ✓        | G007/05-2   | 33.59591  |                  |                 | 3             | 0.4771              |         |                  | 0.02                |             |                  |                             |              |                             |
| ✓        | G007/05-2   | 27.750986 | 27.6736          | 0.15            | 1             | 0                   |         |                  | 0.97                | 7.4         | 1.02             | 1022.46                     |              | <a href="#">i Explain</a>   |
| ✓        | G007/05-2   | 27.596184 |                  |                 | 1             | 0                   |         |                  | 1.08                |             |                  |                             |              |                             |

### Transgene(RRS)

| Involved | Sample name | Cq value  | Average Cq value | Replicates Δ Cq | Rel. quantity | log (Rel. quantity) | Slope  | Slope difference | Calculated copy no. | CV copy no. | Average copy no. | dilution corrected copy no. | CV dilutions | Reference copy no. | Normalized target copy no. | Final result | CV Normalized target copy no. | Warning       |  |
|----------|-------------|-----------|------------------|-----------------|---------------|---------------------|--------|------------------|---------------------|-------------|------------------|-----------------------------|--------------|--------------------|----------------------------|--------------|-------------------------------|---------------|--|
| ✓        | G007/05-1   | 31.173443 | 31.2018          | 0.06            | 3             | 0.4771              | 2.7508 | 6.25             | 0.33                | 2.62        | 0.32             | 107.05                      | 106.36       | /                  | /                          | /            | /                             | QC ref failed |  |
| ✓        | G007/05-1   | 31.230198 |                  |                 | 3             | 0.4771              |        |                  | 0.32                |             |                  |                             |              |                    |                            |              |                               |               |  |
| ✓        | G007/05-1   | 29.857807 | 29.8893          | 0.06            | 1             | 0                   |        |                  | 0.77                | 2.91        | 0.76             | 756.55                      |              | /                  | /                          |              |                               |               |  |
| ✓        | G007/05-1   | 29.920862 |                  |                 | 1             | 0                   |        |                  | 0.74                |             |                  |                             |              |                    |                            |              |                               |               |  |
| ✓        | G007/05-2   | 32.371902 | 32.5054          | 0.27            | 3             | 0.4771              | 4.7414 | 8.25             | 0.15                | 12.3        | 0.14             | 45.87                       | 121.37       | /                  | /                          | /            | /                             | QC ref failed |  |
| ✓        | G007/05-2   | 32.638992 |                  |                 | 3             | 0.4771              |        |                  | 0.13                |             |                  |                             |              |                    |                            |              |                               |               |  |
| ✓        | G007/05-2   | 30.323923 | 30.2432          | 0.16            | 1             | 0                   |        |                  | 0.57                | 7.44        | 0.6              | 601.2                       |              | /                  | /                          |              |                               |               |  |
| ✓        | G007/05-2   | 30.162497 |                  |                 | 1             | 0                   |        |                  | 0.63                |             |                  |                             |              |                    |                            |              |                               |               |  |

**Additional file 8: GMO quantification use case.** Two DNA extractions of the unknown sample (G007/5-1 and G007/5-2) were analyzed for the quantity of the transgene (RRS) in comparison to the reference gene (lectin) copy numbers. The reactions were set as described by Cankar et al. (2006) with two dilutions, each with two technical replicates for each of the isolations. The standard curve of the reference material with 5% RSS was set with 6 serial dilutions for the lectin and 4 for the RSS, each with three technical replicates. The data was analyzed without any QC (top panel) and using quantGenius default QC parameters (bottom panel). Because of vast inhibition, the results calculated from different dilutions differ tremendously (red arrow). Using quantGenius DSS, the efficiency problems are exposed by highlighting the QC parameters that are out of predefined thresholds (orange arrows). The reference gene copy numbers and final results are not given and a warning is issued (blue arrows).
